# Supplementary material for: Characterization of in situ cosmogenic 14 CO production, retention and loss in firn and shallow ice at Summit, Greenland
Source: Copernicus journal article supplement (doi:10.5194/tc-2023-121), 2023-09-26
Supplement: Supplementary file 1 [file tc-2023-121-supplement.pdf]

**Supplement for “Characterization of *in situ* cosmogenic  $^{14}\text{C}$  production, retention and loss in firn and shallow ice at Summit, Greenland” by Hmiel et al.**

5 **Table S1: Measurements and associated corrections for Summit 2013 firn air samples.**

All uncertainties represent  $\pm 1\sigma$ . Measured pMC values shown are after the empirical correction for ANSTO processing. The procedural blanks were not measured for  $\delta^{13}\text{C}$  and a value of  $-32.5 \pm 7.5$  ‰ is assumed instead; this large uncertainty does not make a significant impact on the uncertainty of the final  $^{14}\text{C}$  values since the CO carbon from air in the blanks contributed only ~1-2% of total C in the diluted samples that were measured for  $^{14}\text{C}$ . No corrections for firn gravitational or diffusive isotopic fractionation were applied, as these are also negligible compared to other sources of  $^{14}\text{C}$  uncertainty.

10

| Sample depth, m    | Measured $x_{\text{CO}}$ prior to dilution, nmol / mol | Measured $\delta^{13}\text{C}$ prior to dilution, ‰ relative to VPDB | Fraction of CO carbon from sample after dilution with $^{14}\text{C}$ -depleted high-CO gas | Measured $^{14}\text{C}$ of CO in diluted samples, pMC | $^{14}\text{C}$ corrected for dilution, molecules / $\text{cm}^3$ STP air | $^{14}\text{C}$ further corrected for procedural blank, molecules / $\text{cm}^3$ STP air |
|--------------------|--------------------------------------------------------|----------------------------------------------------------------------|---------------------------------------------------------------------------------------------|--------------------------------------------------------|---------------------------------------------------------------------------|-------------------------------------------------------------------------------------------|
| 0                  | 151.7 ± 3.0                                            | -24.85 ± 0.17                                                        | 0.0909 ± 0.0035                                                                             | 47.99 ± 0.70                                           | 23.70 ± 0.88                                                              | 20.55 ± 0.94                                                                              |
| 11.32              | 187.4 ± 3.0                                            | -26.89 ± 0.19                                                        | 0.0913 ± 0.0030                                                                             | 42.29 ± 0.54                                           | 25.50 ± 0.82                                                              | 22.57 ± 0.86                                                                              |
| 20.99              | 153.7 ± 3.0                                            | -26.88 ± 0.17                                                        | 0.0906 ± 0.0034                                                                             | 48.49 ± 0.67                                           | 24.35 ± 0.89                                                              | 21.52 ± 0.92                                                                              |
| 31.83              | 152.0 ± 3.0                                            | -26.54 ± 0.20                                                        | 0.0907 ± 0.0035                                                                             | 48.66 ± 0.89                                           | 24.13 ± 0.94                                                              | 21.42 ± 0.96                                                                              |
| 44.69              | 149.5 ± 3.0                                            | -25.89 ± 0.17                                                        | 0.0915 ± 0.0036                                                                             | 52.42 ± 0.78                                           | 25.38 ± 0.96                                                              | 22.77 ± 0.98                                                                              |
| 60.25              | 142.8 ± 3.0                                            | -25.11 ± 0.19                                                        | 0.0909 ± 0.0037                                                                             | 56.79 ± 1.03                                           | 26.50 ± 1.06                                                              | 24.01 ± 1.08                                                                              |
| 68.02              | 145.3 ± 3.0                                            | -24.87 ± 0.17                                                        | 0.0911 ± 0.0045                                                                             | 56.48 ± 0.67                                           | 26.75 ± 1.29                                                              | 24.37 ± 1.30                                                                              |
| 69.98              | 160.0 ± 3.0                                            | -26.42 ± 0.25                                                        | 0.0917 ± 0.0034                                                                             | 53.29 ± 0.87                                           | 27.59 ± 1.02                                                              | 25.20 ± 1.03                                                                              |
| 72.21              | 156.6 ± 3.0                                            | -24.81 ± 0.20                                                        | 0.0912 ± 0.0034                                                                             | 56.83 ± 0.95                                           | 29.00 ± 1.08                                                              | 26.72 ± 1.09                                                                              |
| 74.05              | 181.5 ± 3.0                                            | -24.71 ± 0.17                                                        | 0.0909 ± 0.0030                                                                             | 57.03 ± 0.63                                           | 33.81 ± 1.07                                                              | 31.53 ± 1.08                                                                              |
| 76.04              | 173.0 ± 3.0                                            | -25.02 ± 0.17                                                        | 0.0911 ± 0.0031                                                                             | 61.90 ± 0.75                                           | 34.97 ± 1.16                                                              | 32.80 ± 1.17                                                                              |
| 78.03              | 181.8 ± 3.0                                            | -24.97 ± 0.17                                                        | 0.0907 ± 0.0030                                                                             | 65.41 ± 0.73                                           | 39.05 ± 1.23                                                              | 36.88 ± 1.24                                                                              |
| 80.06              | 175.0 ± 3.0                                            | -26.08 ± 0.37                                                        | 0.0912 ± 0.0031                                                                             | 74.14 ± 1.15                                           | 42.47 ± 1.45                                                              | 40.41 ± 1.46                                                                              |
| procedural blank 1 | 19.0 ± 3.0                                             | -32.50 ± 7.50                                                        | 0.0132 ± 0.0021                                                                             | 8.24 ± 0.41                                            | 3.04 ± 0.23                                                               |                                                                                           |
| procedural blank 2 | 30.2 ± 3.0                                             | -32.50 ± 7.50                                                        | 0.0211 ± 0.0023                                                                             | 5.49 ± 0.19                                            | 1.83 ± 0.13                                                               |                                                                                           |
| dilution gas       | 10290 ± 130                                            | -40.07 ± 0.18                                                        |                                                                                             | 1.26 ± 0.06                                            |                                                                           |                                                                                           |

15 **Table S2: Sampling details and some parameters relevant for  $^{14}\text{C}$  calculations and corrections for 2014 and 2015 firn matrix (FM), LIZ and bubbly ice (BI) samples and accompanying procedural blanks.** Note that to apply the solubility correction, the  $[\text{}^{14}\text{CO}]$  values are divided by the factor shown in the table.

| Sample or Blank name     | Depth range of sampled firn or ice, m | Number of melt or simulated extractions performed | Total mass of firn or ice melted (kg) | Effective total air content ( $\text{cm}^3$ STP / g ice) | Fraction of air in sample from closed porosity (for LIZ and ice) or microbubbles (for firn matrix) | Solubility correction factor for $\chi_{\text{CO}}$ and $[\text{}^{14}\text{CO}]$ |
|--------------------------|---------------------------------------|---------------------------------------------------|---------------------------------------|----------------------------------------------------------|----------------------------------------------------------------------------------------------------|-----------------------------------------------------------------------------------|
| Surface Sample (2014 FM) | 0.24 – 1.0                            | 7                                                 | 1287.74 ± 25.77                       | 0.106 ± 0.002                                            | 0.0062 ± 0.0003                                                                                    | 0.9977 ± 0.0001                                                                   |
| ~4.5m sample (2014 FM)   | 3.63 – 5.39                           | 8                                                 | 1501.41 ± 29.96                       | 0.090 ± 0.002                                            | 0.0095 ± 0.0005                                                                                    | 0.9973 ± 0.0001                                                                   |
| ~10m sample (2014 FM)    | 9.02 – 10.9                           | 6                                                 | 1430.27 ± 28.68                       | 0.086 ± 0.002                                            | 0.0089 ± 0.0002                                                                                    | 0.9962 ± 0.0002                                                                   |
| ~20m sample (2014 FM)    | 19.12 – 20.92                         | 6                                                 | 1618.64 ± 32.26                       | 0.080 ± 0.002                                            | 0.0103 ± 0.0002                                                                                    | 0.9957 ± 0.0002                                                                   |
| ~36m sample (2015 FM)    | 31.2 – 42                             | 5                                                 | 1528.34 ± 5.04                        | 0.082 ± 0.001                                            | 0.0082 ± 0.0004                                                                                    | 0.9945 ± 0.0002                                                                   |
| ~53m sample (2015 FM)    | 47.9 – 58.9                           | 5                                                 | 1766.77 ± 5.04                        | 0.073 ± 0.002                                            | 0.0146 ± 0.0003                                                                                    | 0.9933 ± 0.0002                                                                   |
| ~70m sample (2015 LIZ)   | 63.5 – 74.7                           | 2                                                 | 718.88 ± 3.19                         | 0.078 ± 0.001                                            | 0.251 ± 0.002                                                                                      | 0.9928 ± 0.0007                                                                   |
| ~80m sample (2015 LIZ)   | 74.9 – 85.5                           | 2                                                 | 771.98 ± 3.19                         | 0.087 ± 0.001                                            | 0.861 ± 0.008                                                                                      | 0.9914 ± 0.0009                                                                   |
| ~90m sample (2015 BI)    | 85.5 – 96.7                           | 2                                                 | 771.98 ± 3.19                         | 0.090 ± 0.002                                            | 1                                                                                                  | 0.9913 ± 0.0009                                                                   |
| ~100m sample (2015 BI)   | 96.7 – 107.5                          | 2                                                 | 789.69 ± 3.19                         | 0.090 ± 0.002                                            | 1                                                                                                  | 0.9906 ± 0.0009                                                                   |
| ~130m sample (2015 BI)   | 124.7 – 135.9                         | 3                                                 | 1190.06 ± 3.91                        | 0.090 ± 0.002                                            | 1                                                                                                  | 0.9906 ± 0.0009                                                                   |
| 2014 Water Blank #1      |                                       | 7                                                 |                                       |                                                          |                                                                                                    | 0.9974 ± 0.0001                                                                   |
| 2014 Water Blank #2      |                                       | 7                                                 |                                       |                                                          |                                                                                                    | 0.9958 ± 0.0001                                                                   |
| 2015 Water Blank #1      |                                       | 5                                                 |                                       |                                                          |                                                                                                    | 0.9940 ± 0.0002                                                                   |
| 2015 Water Blank #2      |                                       | 3                                                 |                                       |                                                          |                                                                                                    | 0.9901 ± 0.0035                                                                   |

20 **Table S3: Further measurements and parameters relevant for  $^{14}\text{C}$  calculations and corrections for firn matrix (FM), LIZ and bubbly ice (BI) samples.** All uncertainties represent  $\pm 1\sigma$ . The relatively large uncertainties for  $x_{\text{CO}}$  contribution from closed porosity and for extraneous  $x_{\text{CO}}$  derive from a combination of 1) uncertainties in trapped air age distributions in the LIZ, 2) uncertain *in situ*  $x_{\text{CO}}$  production in LIZ and ice and associated uncertainty in atmospheric  $x_{\text{CO}}$  history and 3)  $x_{\text{CO}}$  agreement for water blanks from the same season. \*The 130 m sample had  
 25 sufficient air to perform the CO carbon extraction and  $^{14}\text{C}$  measurement in triplicate; the value and uncertainty shown here represent the mean and standard deviation of the 3 measurements.

| Sample, blank or standard gas name | Measured $x_{\text{CO}}$ in undiluted samples, nmol / mol | Fraction of CO carbon from sample after dilution | Estimated $x_{\text{CO}}$ contribution from closed porosity (air bubbles), nmol / mol | Extraneous $x_{\text{CO}}$ not accounted for by water blanks or closed porosity $x_{\text{CO}}$ , nmol / mol | Measured $\delta^{13}\text{C}$ in undiluted samples, ‰ relative to VPDB | $^{14}\text{C}$ activity measured in diluted samples, after ANSTO empirical correction, pMC |
|------------------------------------|-----------------------------------------------------------|--------------------------------------------------|---------------------------------------------------------------------------------------|--------------------------------------------------------------------------------------------------------------|-------------------------------------------------------------------------|---------------------------------------------------------------------------------------------|
| Surface Sample (2014 FM)           | 477.0 $\pm$ 3.0                                           | 0.241 $\pm$ 0.007                                |                                                                                       | 275 $\pm$ 8                                                                                                  | -35.74 $\pm$ 0.17                                                       | 34.38 $\pm$ 0.50                                                                            |
| ~4.5m sample (2014 FM)             | 342.6 $\pm$ 3.0                                           | 0.153 $\pm$ 0.004                                |                                                                                       | 141 $\pm$ 8                                                                                                  | -37.18 $\pm$ 0.17                                                       | 52.11 $\pm$ 0.61                                                                            |
| ~10m sample (2014 FM)              | 333.4 $\pm$ 3.0                                           | 0.106 $\pm$ 0.002                                |                                                                                       | 131 $\pm$ 8                                                                                                  | -37.20 $\pm$ 0.17                                                       | 40.52 $\pm$ 0.55                                                                            |
| ~20m sample (2014 FM)              | 333.5 $\pm$ 3.0                                           | 0.140 $\pm$ 0.004                                |                                                                                       | 132 $\pm$ 8                                                                                                  | -37.14 $\pm$ 0.17                                                       | 64.38 $\pm$ 0.65                                                                            |
| ~36m sample (2015 FM)              | 198.5 $\pm$ 2.0                                           | 0.075 $\pm$ 0.002                                |                                                                                       | 121 $\pm$ 30                                                                                                 | -32.42 $\pm$ 0.50                                                       | 49.86 $\pm$ 0.57                                                                            |
| ~53m sample (2015 FM)              | 189.0 $\pm$ 2.0                                           | 0.097 $\pm$ 0.003                                |                                                                                       | 111 $\pm$ 30                                                                                                 | -31.56 $\pm$ 0.50                                                       | 59.68 $\pm$ 0.52                                                                            |
| ~70m sample (2015 LIZ)             | 246.1 $\pm$ 2.0                                           | 0.054 $\pm$ 0.001                                | 36 $\pm$ 10                                                                           | 133 $\pm$ 32                                                                                                 | -30.54 $\pm$ 0.50                                                       | 26.04 $\pm$ 0.32                                                                            |
| ~80m sample (2015 LIZ)             | 290.3 $\pm$ 2.0                                           | 0.118 $\pm$ 0.003                                | 129 $\pm$ 10                                                                          | 84 $\pm$ 32                                                                                                  | -27.98 $\pm$ 0.50                                                       | 77.91 $\pm$ 0.68                                                                            |
| ~90m sample (2015 BI)              | 304.2 $\pm$ 2.0                                           | 0.072 $\pm$ 0.001                                | 120 $\pm$ 20                                                                          | 106 $\pm$ 36                                                                                                 | -27.16 $\pm$ 0.50                                                       | 52.87 $\pm$ 0.63                                                                            |
| ~100m sample (2015 BI)             | 284.0 $\pm$ 2.0                                           | 0.045 $\pm$ 0.001                                | 98 $\pm$ 20                                                                           | 109 $\pm$ 36                                                                                                 | -27.70 $\pm$ 0.50                                                       | 41.35 $\pm$ 0.65                                                                            |
| ~130m sample (2015 BI)             | 279.2 $\pm$ 2.0                                           | 0.066 $\pm$ 0.001                                | 90 $\pm$ 20                                                                           | 111 $\pm$ 36                                                                                                 | -26.47 $\pm$ 0.50                                                       | 68.17 $\pm$ 0.54*                                                                           |
| 2014 Water Blank #1                | 196.7 $\pm$ 3.0                                           | 0.071 $\pm$ 0.002                                |                                                                                       |                                                                                                              | -38.65 $\pm$ 0.16                                                       | 12.39 $\pm$ 0.37                                                                            |
| 2014 Water Blank #2                | 207.3 $\pm$ 3.0                                           | 0.110 $\pm$ 0.003                                |                                                                                       |                                                                                                              | -38.05 $\pm$ 0.17                                                       | 17.03 $\pm$ 0.29                                                                            |
| 2015 Water Blank #1                | 56.6 $\pm$ 2.0                                            | 0.023 $\pm$ 0.001                                |                                                                                       |                                                                                                              | -31.94 $\pm$ 0.50                                                       | 22.66 $\pm$ 0.29                                                                            |
| 2015 Water Blank #2                | 98.9 $\pm$ 2.0                                            | 0.019 $\pm$ 0.001                                |                                                                                       |                                                                                                              | -34.55 $\pm$ 0.50                                                       | 10.61 $\pm$ 0.31                                                                            |
| dilution gas                       | 10290 $\pm$ 130                                           |                                                  |                                                                                       |                                                                                                              | -40.07 $\pm$ 0.18                                                       | 1.39 $\pm$ 0.03 (2014)<br>1.66 $\pm$ 0.02 (2015)                                            |
| 2014 standard gas                  | 131.6 $\pm$ 2.0                                           |                                                  |                                                                                       |                                                                                                              |                                                                         |                                                                                             |

**Table S4: Firn matrix, LIZ and bubbly ice sample [<sup>14</sup>CO] after each correction step**

| Sample, blank or standard gas name | [ <sup>14</sup> CO] corrected for dilution, molecules / cm <sup>3</sup> STP air | [ <sup>14</sup> CO] further corrected for dissolution, molecules / cm <sup>3</sup> STP air | [ <sup>14</sup> CO] further corrected for water blanks, molecules / cm <sup>3</sup> STP air | [ <sup>14</sup> CO] further corrected for extraneous <sub>XCO</sub> , molecules / cm <sup>3</sup> STP air | [ <sup>14</sup> CO] further corrected for microbubble air (FM only), molecules / cm <sup>3</sup> STP air | [ <sup>14</sup> CO] in sample after all corrections, molecules / g ice |
|------------------------------------|---------------------------------------------------------------------------------|--------------------------------------------------------------------------------------------|---------------------------------------------------------------------------------------------|-----------------------------------------------------------------------------------------------------------|----------------------------------------------------------------------------------------------------------|------------------------------------------------------------------------|
| Surface Sample (2014 FM)           | 20.0 ± 0.6                                                                      | 20.0 ± 0.6                                                                                 | 10.9 ± 0.7                                                                                  | 6.6 ± 2.3                                                                                                 | 6.4 ± 2.3                                                                                                | 0.68 ± 0.24                                                            |
| ~4.5m sample (2014 FM)             | 34.6 ± 1.0                                                                      | 34.7 ± 1.0                                                                                 | 25.5 ± 1.0                                                                                  | 23.3 ± 1.5                                                                                                | 23.1 ± 1.5                                                                                               | 2.07 ± 0.14                                                            |
| ~10m sample (2014 FM)              | 37.5 ± 1.0                                                                      | 37.6 ± 1.0                                                                                 | 28.4 ± 1.0                                                                                  | 26.4 ± 1.4                                                                                                | 26.2 ± 1.4                                                                                               | 2.25 ± 0.14                                                            |
| ~20m sample (2014 FM)              | 45.5 ± 1.2                                                                      | 45.7 ± 1.2                                                                                 | 36.5 ± 1.3                                                                                  | 34.4 ± 1.6                                                                                                | 34.2 ± 1.6                                                                                               | 2.74 ± 0.15                                                            |
| ~36m sample (2015 FM)              | 38.5 ± 1.1                                                                      | 38.8 ± 1.1                                                                                 | 24.1 ± 1.2                                                                                  | 22.2 ± 1.6                                                                                                | 22.0 ± 1.6                                                                                               | 1.80 ± 0.14                                                            |
| ~53m sample (2015 FM)              | 34.3 ± 1.0                                                                      | 34.5 ± 1.1                                                                                 | 20.0 ± 1.2                                                                                  | 18.3 ± 1.6                                                                                                | 18.0 ± 1.6                                                                                               | 1.31 ± 0.12                                                            |
| ~70m sample (2015 LIZ)             | 33.5 ± 0.8                                                                      | 33.7 ± 0.8                                                                                 | 19.1 ± 1.0                                                                                  | 17.1 ± 1.5                                                                                                |                                                                                                          | 1.33 ± 0.12                                                            |
| ~80m sample (2015 LIZ)             | 57.2 ± 1.5                                                                      | 57.7 ± 1.5                                                                                 | 43.3 ± 1.6                                                                                  | 42.0 ± 1.8                                                                                                |                                                                                                          | 3.66 ± 0.17                                                            |
| ~90m sample (2015 BI)              | 65.7 ± 1.5                                                                      | 66.3 ± 1.6                                                                                 | 51.8 ± 1.7                                                                                  | 50.2 ± 1.9                                                                                                |                                                                                                          | 4.54 ± 0.20                                                            |
| ~100m sample (2015 BI)             | 75.5 ± 1.8                                                                      | 76.2 ± 1.9                                                                                 | 61.7 ± 2.0                                                                                  | 60.0 ± 2.2                                                                                                |                                                                                                          | 5.43 ± 0.23                                                            |
| ~130m sample (2015 BI)             | 85.7 ± 1.7                                                                      | 86.5 ± 1.7                                                                                 | 72.2 ± 1.8                                                                                  | 70.5 ± 2.1                                                                                                |                                                                                                          | 6.37 ± 0.23                                                            |
| 2014 Water Blank #1                | 9.3 ± 0.4                                                                       | 9.3 ± 0.4                                                                                  |                                                                                             |                                                                                                           |                                                                                                          |                                                                        |
| 2014 Water Blank #2                | 9.0 ± 0.3                                                                       | 9.0 ± 0.3                                                                                  |                                                                                             |                                                                                                           |                                                                                                          |                                                                        |
| 2015 Water Blank #1                | 15.4 ± 0.5                                                                      | 15.5 ± 0.5                                                                                 |                                                                                             |                                                                                                           |                                                                                                          |                                                                        |
| 2015 Water Blank #2                | 14.1 ± 0.6                                                                      | 14.2 ± 0.6                                                                                 |                                                                                             |                                                                                                           |                                                                                                          |                                                                        |
